# Supplementary material for: Phylogenetic analysis reveals dynamic evolution of the poly(A)-binding protein gene family in plants
Source: PubMed Central journal article supplement (PMC4252990; doi:10.1186/s12862-014-0238-4), 2014-11-25
Supplement: 12862_2014_238_MOESM1_ESM.pdf [file 12862_2014_238_MOESM1_ESM.pdf]

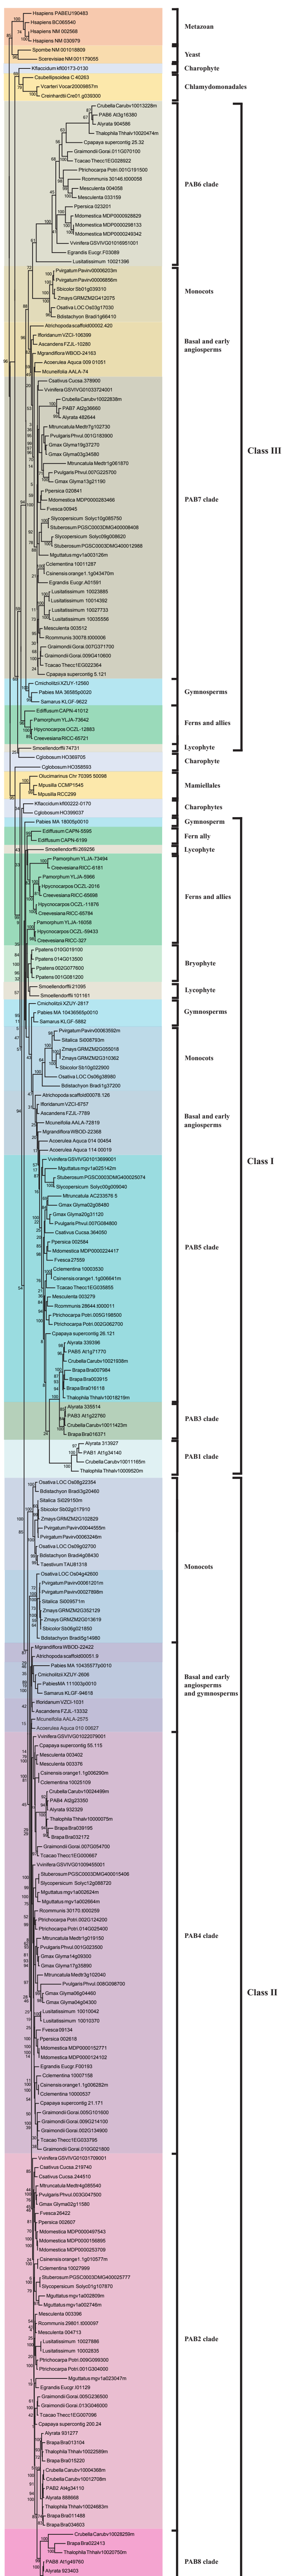

**Phylogenetic analysis of PABP proteins in plants.** A phylogenetic tree of PABP proteins in plants was constructed using the maximum-likelihood method. Numbers on each branch denoted percentages of bootstrap support. PABP sequences from yeast and humans were used to root the tree.
