# Supplementary material for: Phylogenetic analysis reveals dynamic evolution of the poly(A)-binding protein gene family in plants
Source: PubMed Central journal article supplement (PMC4252990; doi:10.1186/s12862-014-0238-4), 2014-11-25
Supplement: 12862_2014_238_MOESM2_ESM.pdf [file 12862_2014_238_MOESM2_ESM.pdf]

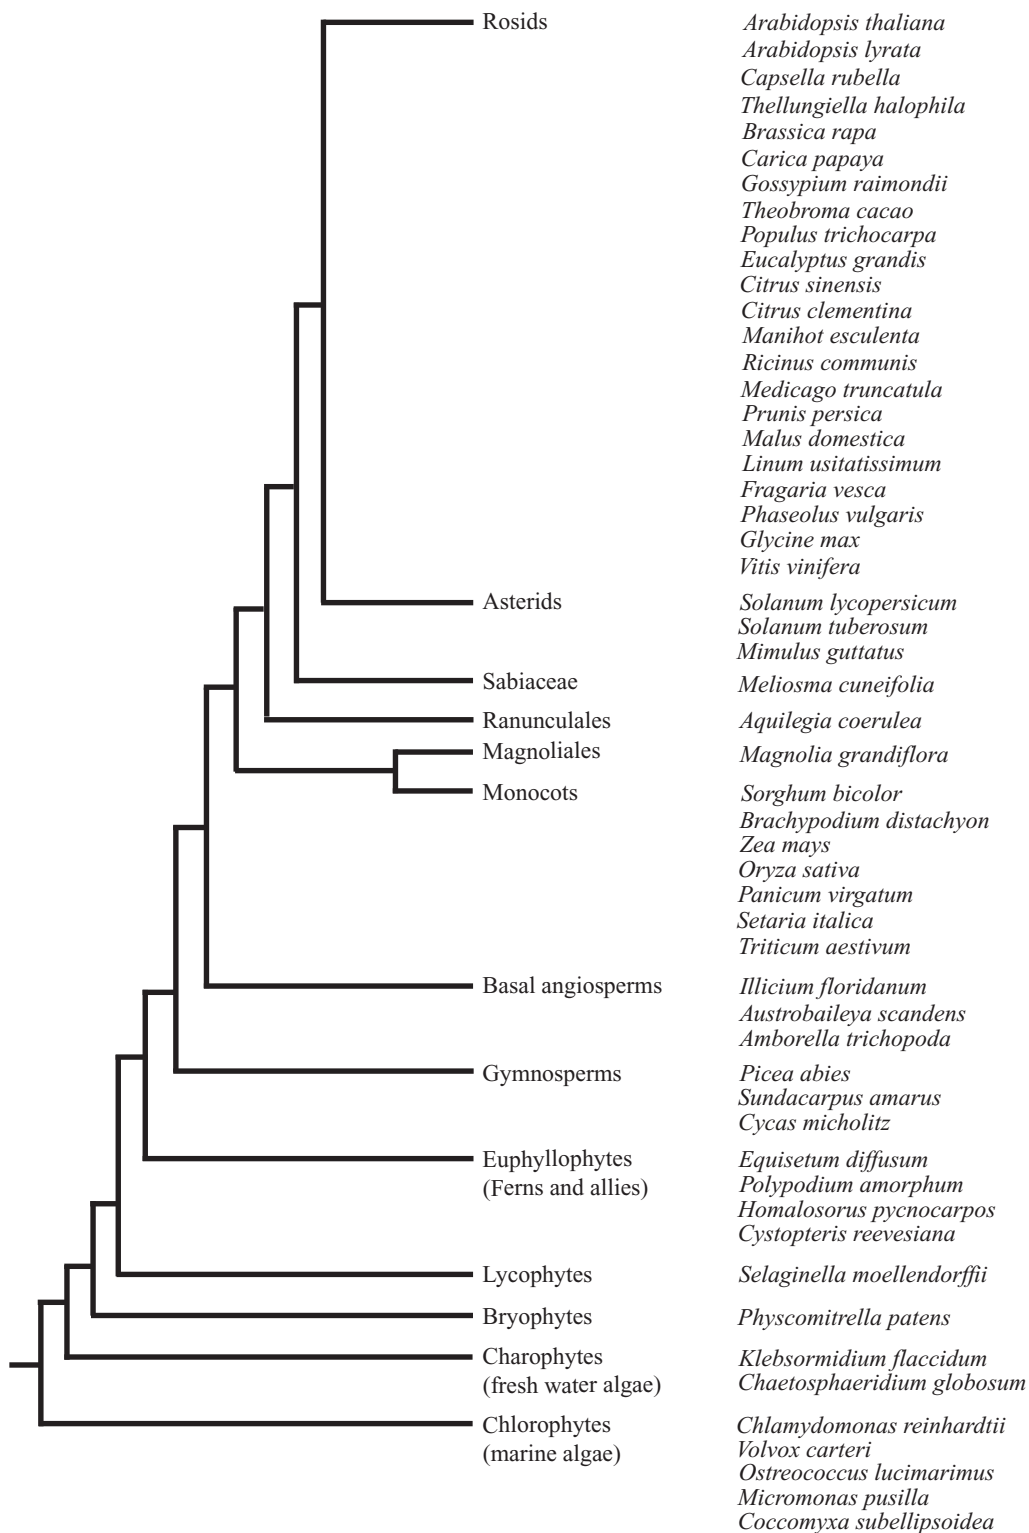

**Phylogenetic relationships among the plant species used in this study.** Plant groups and their relationships are shown to the left with the corresponding species included in the analysis listed to the right.
